# Supplementary material for: Beta vulgaris Assisted Fabrication of Novel Ag-Cu Bimetallic Nanoparticles for Growth Inhibition and Virulence in Candida albicans
Source: MDPI journal article supplement (doi:10.3390/pharmaceutics13111957), 2021-11-18
Supplement: s1 [file s1]

# Supplementary Materials: *Beta Vulgaris* Assisted Fabrication of Novel Ag-Cu Bimetallic Nanoparticles for Growth Inhibition and Virulence in *Candida Albicans*

Majid Rasool Kamli, Maqsood Ahmad Malik, Shabir Ahmad Lone, Jamal S.M. Sabir, Ehab H. Mattar and Aijaz Ahmad

**Table S1.** List of primers used for RT-qPCR experiments.

| Gene  | Primer  | Sequence (5'–3')              |
|-------|---------|-------------------------------|
| ALS1  | Forward | GCT CCA TCA CCT GCT GTT TC    |
|       | Reverse | CTG AGG TGC CTG TTG TCA AG    |
| ALS2  | Forward | TTT AAG GCT GGC ACC AAC AC    |
|       | Reverse | ATT GTG AAC CCC ATT GCA CC    |
| ALS3  | Forward | CTA CCG CTG TGA CCA CCT TA    |
|       | Reverse | CAG TTT CCC CAA TTG GTG CA    |
| ALS9  | Forward | CGA TTT CAG TTA GCA CCG CA    |
|       | Reverse | CGT TGA AGT TGG CAC CTC TC    |
| CPH1  | Forward | GTC GCC ACC CCA ACC TAT AT    |
|       | Reverse | AGG AAA CCC AGA AGC GTC AT    |
| HWP1  | Forward | CTG AAC CTT CCC CAG TTG CT    |
|       | Reverse | CGA CAG CAC TAG ATT CCG GA    |
| SAP1  | Forward | TTT GGT GGG GTT GAC AAA GC    |
|       | Reverse | ATG ACC TTG ACC GTC CAG TT    |
| SAP2  | Forward | CCG TTG GAT TTG GTG GTG TT    |
|       | Reverse | AGC ATT ATC AAC CCC ACC GA    |
| SAP3  | Forward | TGG TCC CCA AGG TGA AAT CA    |
|       | Reverse | TGT CCT TGA CCA GCT TGA CA    |
| PLB1  | Forward | ATA TGC TCC TGG TCC GGT TT    |
|       | Reverse | ATT GCT CTA TAC CCT CCG CC    |
| ACT1  | Forward | TGG TGA TGA AGC CCA ATC CA    |
|       | Reverse | CAT TGG AGC TTC GGT CAA CA    |
| PMA1  | Forward | GAA GGT GCT ACT GAT GCT GC    |
|       | Reverse | GCA ACA TCA GCG AAA ATG GC    |
| RPP2B | Forward | ACA CCT CTC CAT CAG CTT CT    |
|       | Reverse | TGG GAC AGA AGC TAA TTT GGT G |
